# Supplementary material for: Efficacy and safety of long-acting β-agonist/long-acting muscarinic antagonist combinations in COPD: a network meta-analysis
Source: HighWire-hosted journal article supplement (doi:10.1136/thoraxjnl-2014-206732), 2015-10-21
Supplement: thoraxjnl-2014-206732supp_table3.pdf [file thoraxjnl-2014-206732supp_table3.pdf]

**Table S3. Study quality**

| Study, year              | Concealed allocation | ITT analysis     | Blinding         | Incomplete Outcome Data Addressed | Free of Selective Outcome Reporting |
|--------------------------|----------------------|------------------|------------------|-----------------------------------|-------------------------------------|
| Buhl 2015 [19]           | Yes                  | Yes              | Yes              | Unclear                           | Yes                                 |
| Celli 2014 [20]          | Yes                  | Yes              | Yes              | Yes                               | Yes                                 |
| Decramer 2014 a&b [21]   | Yes                  | Yes              | Yes              | Yes                               | Yes                                 |
| D'Urzo 2014 [22]         | Yes                  | Yes              | Yes              | Yes                               | Yes                                 |
| Maleki-Yazdi 2014 [23]   | Yes                  | Yes              | Yes              | Yes                               | Yes                                 |
| Singh 2014 [24]          | Yes                  | Yes              | Yes              | Yes                               | Yes                                 |
| ZuWallack 2014 [26]      | Yes                  | Yes <sup>§</sup> | Yes              | Yes                               | Yes                                 |
| Donohue 2013 [29]        | Yes                  | Yes              | Yes              | Yes                               | Yes                                 |
| Donohue 2014 [31]        | Yes                  | Yes              | Yes              | Unclear                           | Yes                                 |
| DB2114417 2012 [32]      | Yes                  | Yes              | Yes              | Unclear                           | Yes                                 |
| DB2114418 2012 [33]      | Yes                  | Yes              | Yes              | Unclear                           | Yes                                 |
| Vincken 2014 [25]        | Yes                  | Yes              | Yes              | Yes                               | Yes                                 |
| Bateman 2013 [27]        | Yes                  | Yes              | Yes              | Yes                               | Yes                                 |
| Dahl 2013 [28]           | Unclear              | Yes              | Yes              | Unclear                           | Yes                                 |
| Wedzicha 2013 [30]       | Yes                  | Yes              | Yes <sup>¶</sup> | Yes                               | Yes                                 |
| Novartis A1301 2012 [35] | No                   | Yes              | No               | Yes                               | Unclear                             |
| Mahler 2012 a&b [34]     | Yes                  | Yes              | Yes              | Yes                               | Yes                                 |
| Tashkin 2009 [36]        | Unclear              | Yes              | Yes              | Unclear                           | Unclear                             |
| Vogelmeier 2008 [37]     | Unclear              | Yes              | Yes <sup>¶</sup> | Unclear                           | Unclear                             |
| Aaron 2007 [38]          | Yes                  | Yes              | Yes              | Unclear                           | Yes                                 |

¶ Except for tiotropium which was open-label §Treated set (TS) was used, which included all randomized patients who receive at least one dose of double-blind study treatment. Two patients out of 1134 and 1137 patients did not receive study treatment in each trial. ITT= intention-to-treat.
